# Supplementary material
Source: Springer Nature journal article supplement (https://www.springermedizin.de/resource/supplementary/12936_2010_1379_MOESM4_ESM.pdf/9549660)
Supplement: MOESM4 [file 9549660]

2400 patients enrolled

2383 patients with full records

1831 patients microscopy-negative

552 patients microscopy-positive

297 *P. falciparum*

246 *P. vivax*

9 mixed

CareStart:

67 *P. falciparum*  
51 *P. vivax*  
72 Mixed  
1641 Negative

CareStart:

40 *P. falciparum*  
26 *P. vivax*  
213 Mixed  
18 Negative

CareStart:

3 *P. falciparum*  
209 *P. vivax*  
26 Mixed  
8 Negative

CareStart:

0 *P. falciparum*  
0 *P. vivax*  
9 Mixed  
0 Negative

ICT Combo

58 *P. falciparum*  
60 *P. vivax*  
76 Mixed  
1637 Negative

ICT Combo

29 *P. falciparum*  
25 *P. vivax*  
224 Mixed  
19 Negative

ICT Combo

2 *P. falciparum*  
209 *P. vivax*  
27 Mixed  
8 Negative

ICT Combo

0 *P. falciparum*  
0 *P. vivax*  
9 Mixed  
0 Negative

ParaScreen

67 *P. falciparum*  
69 *P. vivax*  
72 Mixed  
1623 Negative

ParaScreen

30 *P. falciparum*  
27 *P. vivax*  
223 Mixed  
17 Negative

ParaScreen

2 *P. falciparum*  
203 *P. vivax*  
35 Mixed  
6 Negative

ParaScreen

1 *P. falciparum*  
0 *P. vivax*  
8 Mixed  
0 Negative
